# Supplementary material
Source: PubMed Central journal article supplement (PMC2799044)
Supplement: NIHMS156587-supplement-01.pdf [file NIHMS156587-supplement-01.pdf]

| <i>C. elegans</i> strain | UV dose (J/m <sup>2</sup> ) | Median survival (days) |
|--------------------------|-----------------------------|------------------------|
| N2                       | 0                           | 11                     |
|                          | 6                           | 11                     |
|                          | 12                          | 9.5                    |
|                          | 25                          | 9.5                    |
|                          | 50                          | 8                      |
|                          | 100                         | 6                      |
| <i>xpa-1</i>             | 0                           | 11                     |
|                          | 6                           | 5                      |
|                          | 12                          | 4.5                    |
|                          | 25                          | 4                      |
|                          | 50                          | 4                      |
|                          | 100                         | 4                      |
| <i>glp-1</i>             | 0                           | 9.5                    |
|                          | 6                           | 8.75                   |
|                          | 12                          | 8.5                    |
|                          | 25                          | 7.5                    |
|                          | 50                          | 6                      |
|                          | 100                         | 5                      |

**Supplemental Table 1. Median days of survival of UVC-exposed adult *C. elegans*.** One day post-L4 molt was counted as "day 0". A total of 8-10 replicate plates per treatment group were monitored; four separate (in time) experiments were carried out. Plates had between 26 and 42 non-censored nematodes each. Censored nematodes were those that crawled onto the sides of the petri dishes and desiccated, were lost during transfer, or disappeared but were not observed to be dead. Nematodes were transferred by washing on a daily basis during the first 7-8 days and every 1-3 days thereafter.
